# Supplementary material
Source: PubMed Central journal article supplement (PMC5710564)

## Supplementary Online Content

Eloy JA, Bobian M, Svider PF, et al. Association of gender with financial relationships between industry and academic otolaryngologists [published online June 1, 2017]. *JAMA Otolaryngol Head Neck Surg*. doi:10.1001/jamaoto.2017.0276

**eFigure.** Gender-Specific Trends in Industry Contributions Organized by Fellowship Training

This supplementary material has been provided by the authors to give readers additional information about their work.

**eFigure.** Gender-Specific Trends in Industry Contributions Organized by Fellowship Training

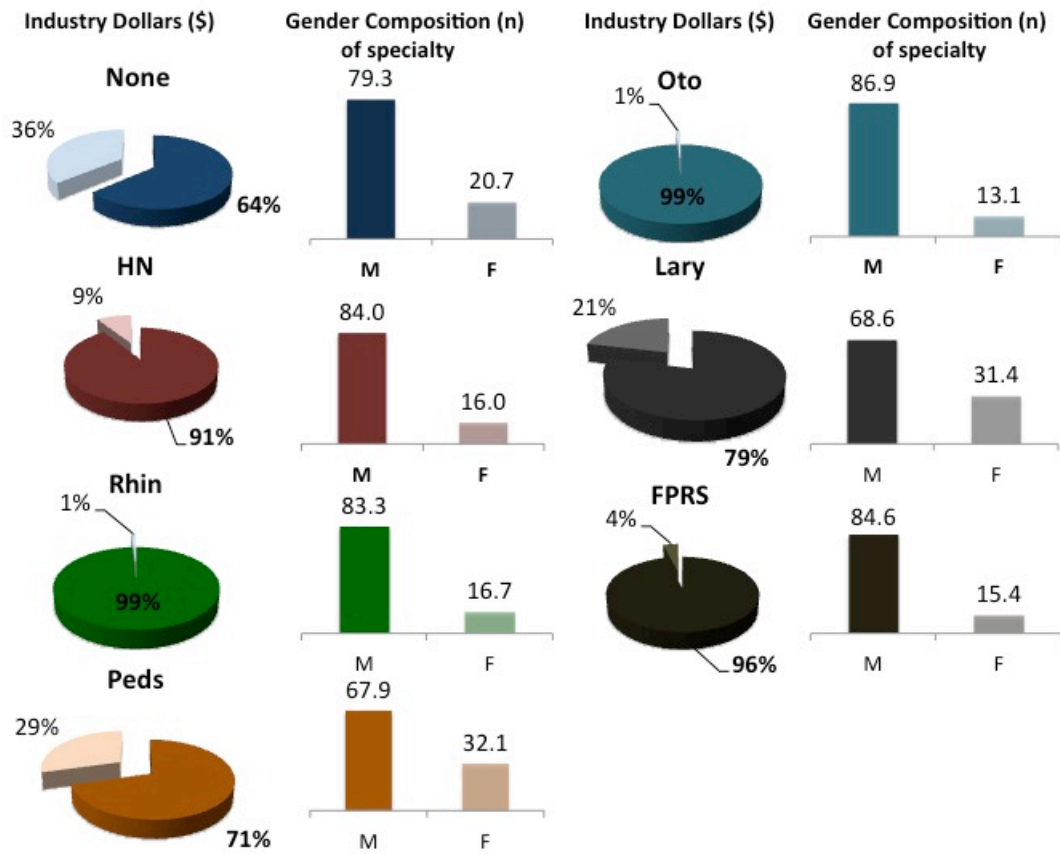

Supplement: jamaotolaryngolheadnecksurg-143-796-s001.pdf [file jamaotolaryngolheadnecksurg-143-796-s001.pdf]
